# Supplementary material for: Significant effects of two pesticides on the bacteriostatic activity and antioxidant ability of green tea polyphenols
Source: PubMed Central journal article supplement — RSC Adv. 2020 Jul 7;10(43):25662–8. doi: 10.1039/d0ra02807j (PMC9055314; doi:10.1039/d0ra02807j), 2020-07-07
Supplement: RA-010-D0RA02807J-s001.pdf [file RA-010-D0RA02807J-s001.pdf]

## Supplementary materials

Table S1 The fitted results by Weibull function and its some statistics for the GTPs - ACE binary mixtures

Table S2 The fitted results by Weibull function and its some statistics for the GTPs - DIQ binary mixtures

Figure. S1 The observed concentration-effect data with 95% OCIs, fitted CRCs and predicted curves by CA of representative rays for GTPs-ACE mixture systems (●: observed data; —: fitted curve; —: predicted curve by CA; ---: 95% OCI)

Figure S2 The observed concentration-effect data with 95% OCIs, fitted CRCs and predicted curves by CA of representative rays for GTPs-DIQ mixture systems (●: observed data; —: fitted curve; —: predicted curve by CA; ---: 95% OCI).

Table S1 The fitted results by Weibull function and its some statistics for the GTPs - ACE  
binary mixtures

| Rays | Time(h) | $\alpha$ | $\beta$ | <i>RMSE</i> | <i>R</i> | EC <sub>50</sub> | pEC <sub>50</sub> |
|------|---------|----------|---------|-------------|----------|------------------|-------------------|
| R1   | 0.25    | 5.10     | 1.58    | 0.010       | 0.9995   | 3.47E-4          | 3.46              |
|      | 2       | 5.28     | 1.62    | 0.012       | 0.9982   | 3.27E-4          | 3.49              |
|      | 4       | 8.12     | 2.41    | 0.022       | 0.9985   | 3.01E-4          | 3.52              |
|      | 8       | 12.52    | 3.76    | 0.045       | 0.9961   | 3.74E-4          | 3.43              |
|      | 12      | 10.31    | 3.09    | 0.020       | 0.9988   | 3.51E-4          | 3.46              |
| R2   | 0.25    | 5.00     | 1.55    | 0.017       | 0.9986   | 3.45E-4          | 3.47              |
|      | 2       | 5.09     | 1.56    | 0.032       | 0.9952   | 3.18E-4          | 3.50              |
|      | 4       | 7.95     | 2.40    | 0.043       | 0.9947   | 3.43E-4          | 3.47              |
|      | 8       | 10.30    | 3.18    | 0.041       | 0.9959   | 4.42E-4          | 3.35              |
|      | 12      | 9.13     | 2.84    | 0.035       | 0.9966   | 4.53E-4          | 3.34              |
| R3   | 0.25    | 4.96     | 1.54    | 0.027       | 0.9965   | 3.33E-4          | 3.48              |
|      | 2       | 4.92     | 1.52    | 0.037       | 0.9933   | 3.33E-4          | 3.48              |
|      | 4       | 6.96     | 2.16    | 0.035       | 0.9954   | 4.06E-4          | 3.39              |
|      | 8       | 10.30    | 3.18    | 0.041       | 0.9959   | 5.43E-4          | 3.26              |
|      | 12      | 8.21     | 2.61    | 0.039       | 0.9944   | 5.18E-4          | 3.29              |
| R4   | 0.25    | 5.02     | 1.55    | 0.034       | 0.9946   | 3.35E-4          | 3.48              |
|      | 2       | 4.84     | 1.46    | 0.035       | 0.9940   | 3.18E-4          | 3.50              |
|      | 4       | 5.85     | 1.78    | 0.026       | 0.9970   | 3.22E-4          | 3.49              |
|      | 8       | 6.47     | 2.05    | 0.037       | 0.9939   | 4.63E-4          | 3.33              |
|      | 12      | 6.53     | 2.08    | 0.035       | 0.9948   | 4.83E-4          | 3.32              |
| R5   | 0.25    | 5.11     | 1.60    | 0.047       | 0.9902   | 3.78E-4          | 3.42              |
|      | 2       | 4.97     | 1.53    | 0.047       | 0.9897   | 3.25E-4          | 3.49              |
|      | 4       | 5.84     | 1.84    | 0.043       | 0.9921   | 4.24E-4          | 3.37              |
|      | 8       | 5.76     | 1.86    | 0.025       | 0.9967   | 5.08E-4          | 3.29              |
|      | 12      | 5.25     | 1.71    | 0.029       | 0.9954   | 5.19E-4          | 3.28              |

Table S2 The fitted results by Weibull function and its some statistics for the GTPs - DIQ  
binary mixtures

| Rays | Time(h) | $\alpha$ | $\beta$ | <i>RMSE</i> | <i>R</i> | EC <sub>50</sub> | pEC <sub>50</sub> |
|------|---------|----------|---------|-------------|----------|------------------|-------------------|
| R1   | 0.25    | 5.58     | 1.17    | 0.040       | 0.9929   | 4.37E-4          | 3.36              |
|      | 2       | 7.23     | 2.23    | 0.046       | 0.9927   | 3.92E-4          | 3.41              |
|      | 4       | 6.97     | 1.97    | 0.030       | 0.9972   | 1.89E-4          | 3.72              |
|      | 8       | 13.03    | 3.66    | 0.043       | 0.9950   | 2.19E-4          | 3.66              |
|      | 12      | 8.48     | 2.30    | 0.066       | 0.9886   | 1.43E-4          | 3.85              |
| R2   | 0.25    | 5.96     | 1.87    | 0.036       | 0.9952   | 4.14E-4          | 3.38              |
|      | 2       | 8.43     | 2.63    | 0.055       | 0.9902   | 4.52E-4          | 3.35              |
|      | 4       | 8.05     | 2.29    | 0.044       | 0.9940   | 2.11E-4          | 3.68              |
|      | 8       | 14.30    | 3.99    | 0.056       | 0.9933   | 2.11E-4          | 3.68              |
|      | 12      | 9.53     | 2.58    | 0.059       | 0.9921   | 1.46E-4          | 3.84              |
| R3   | 0.25    | 6.71     | 2.06    | 0.030       | 0.9964   | 3.67E-4          | 3.43              |
|      | 2       | 8.33     | 2.55    | 0.060       | 0.9876   | 3.89E-4          | 3.41              |
|      | 4       | 7.56     | 2.11    | 0.018       | 0.9989   | 1.75E-4          | 3.76              |
|      | 8       | 13.54    | 3.73    | 0.031       | 0.9975   | 1.87E-4          | 3.73              |
|      | 12      | 10.14    | 2.71    | 0.034       | 0.9967   | 1.33E-4          | 3.88              |
| R4   | 0.25    | 6.52     | 2.00    | 0.030       | 0.9964   | 3.60E-4          | 3.44              |
|      | 2       | 7.59     | 2.32    | 0.050       | 0.9898   | 3.72E-4          | 3.43              |
|      | 4       | 8.09     | 2.23    | 0.032       | 0.9967   | 1.61E-4          | 3.79              |
|      | 8       | 13.09    | 3.53    | 0.050       | 0.9931   | 1.54E-4          | 3.81              |
|      | 12      | 11.25    | 2.93    | 0.057       | 0.9912   | 1.09E-4          | 3.97              |
| R5   | 0.25    | 7.22     | 2.22    | 0.040       | 0.9921   | 3.83E-4          | 3.42              |
|      | 2       | 7.28     | 2.22    | 0.051       | 0.9888   | 3.59E-4          | 3.44              |
|      | 4       | 6.87     | 1.86    | 0.029       | 0.9969   | 1.29E-4          | 3.89              |
|      | 8       | 9.07     | 2.35    | 0.068       | 0.9881   | 9.65E-5          | 4.02              |
|      | 12      | 8.60     | 2.13    | 0.056       | 0.9910   | 6.17E-5          | 4.21              |

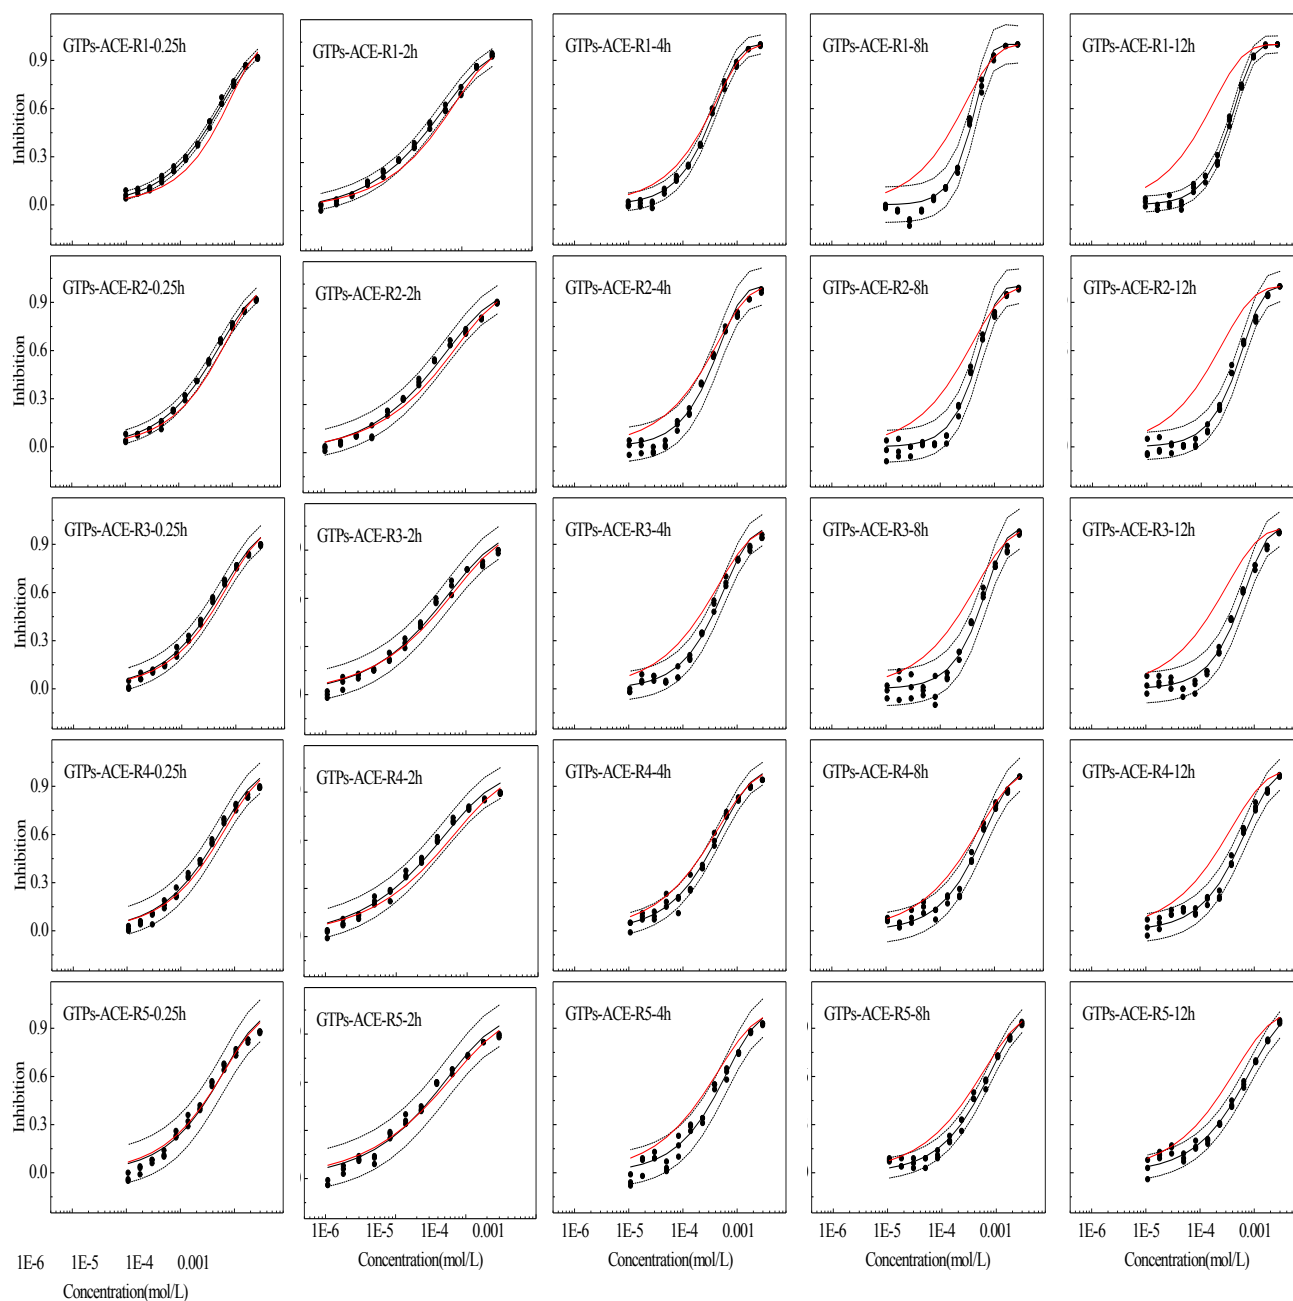

(●: observed data; —: fitted curve; —: predicted curve by CA; ---: 95% OCI)

Figure. S1 The observed concentration-effect data with 95% OCIs, fitted CRCs and predicted curves by CA of representative rays for GTPs-ACE mixture systems

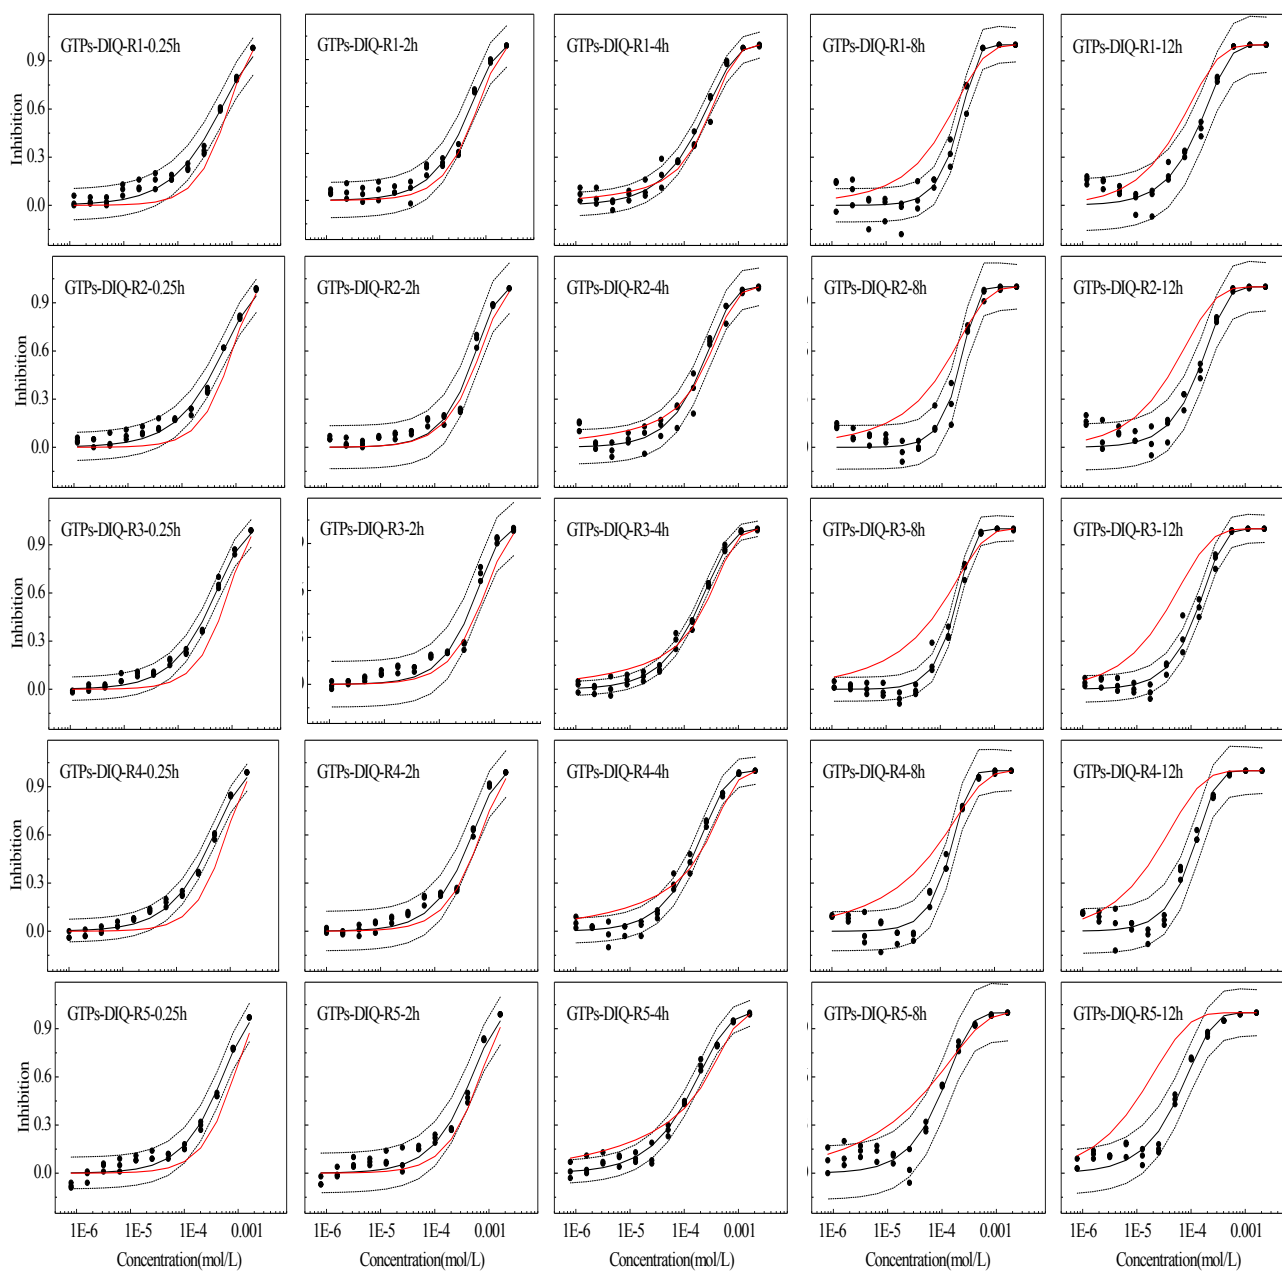

(●: observed data; —: fitted curve; —: predicted curve by CA; ---: 95% OCI).

Figure S2 The observed concentration-effect data with 95% OCIs, fitted CRCs and predicted curves by CA of representative rays for GTPs-DIQ mixture systems
